# Supplementary material for: Emerging linear activity trend in the oxygen evolution reaction with dual-active-sites mechanism
Source: Royal Society of Chemistry journal article supplement (doi:10.1039/d0ta06441f), 2020-01-01
Supplement: d0ta06441f1.pdf [file d0ta06441f1.pdf]

**Supporting Information**

**Emerging Linearity Activity Trend in Oxygen Evolution**

**Reaction with Dual-active-sites Mechanism**

Li Yang,<sup>ab†</sup> Yuxuan Wu,<sup>a†</sup> Fan Wu,<sup>a</sup> Yuan Zhao,<sup>b</sup> Zhiwen Zhuo,<sup>b</sup> Zhaowu Wang,<sup>c</sup> Xiyu Li,<sup>\*b</sup> Yi Luo,<sup>b</sup>  
Jun Jiang<sup>b</sup>

*<sup>a</sup>Institutes of Physical Science and Information Technology, Anhui University, Hefei, Anhui  
230601, P. R. China*

*<sup>b</sup>Hefei National Laboratory for Physical Sciences at the Microscale, CAS Center for Excellence in  
Nanoscience, School of Chemistry and Materials Science, University of Science and Technology  
of China, Hefei, Anhui 230026, P. R. China*

*<sup>c</sup>School of Physics and Engineering, Henan University of Science and Technology, Henan Key  
Laboratory of Photoelectric Energy Storage Materials and Applications, Luoyang, Henan 471023,  
P. R. China*

Corresponding Author: xylizy@ustc.edu.cn

## Computational Methods

The computational approach was carried out within the spin-polarized density functional theory (DFT)<sup>1</sup> by using the Vienna ab initio Simulation Package (VASP) package. The electronic exchange and correlation effects were simulated by the Perdew, Burke and Ernzerhof (PBE) parameterization as implemented in the generalized gradient approximation (GGA).<sup>2</sup> The interactions between the ion cores and valence electrons were described by the projector augmented wave (PAW) pseudo-potentials.<sup>3</sup> With all atoms relaxed, the convergence threshold for the max energy change and forces was set to be  $10^{-4}$  eV and 0.02 eV/Å, respectively. The kinetic energy cutoff of 450 eV was adopted for the plane-wave expansion. As to the nanotube material, we inserted a vacuum space of 15 Å along the x and y directions for isolation, and the nanotube structure is along z axis. The K-point sampling of the Brillouin zone was set to be  $1 \times 1 \times 3$  grid by using the Monkhorst-Pack scheme. Long-range van der Waals (vdW) interactions were considered in the whole calculations by employing the Grimme's DFT-D2 correction.<sup>4</sup> The transition states were calculated by the HOWTOs program as implemented in SSW package, we also examined the transition states through the climbing image nudged elastic band (CI-NEB) method.<sup>5</sup>

It is known that the oxygen molecule with high-spin ground state is often poorly described in DFT calculations. Thus, to avoid the uncertainty of PBE in computing  $O_2$  molecule, the free energy of  $O_2$  is derived from  $G_{O_2}(g) = 2G_{H_2O}(l) - 2G_{H_2}(g) + 4.92$  (eV) based on the whole energy change of  $\{O_2(g) + 4[H^+(aq) + e^-] \rightarrow 2H_2O(l) \rightleftharpoons 2H_2O(g)\}$ . This treatment is adopted in the simulations of OER pathway, including the  $O_2$  formation step ( $*O + *O \rightarrow 2* + O_2$ , Eq.5,  $\Delta G_5$ ).

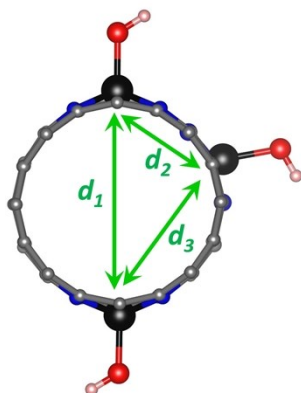

**Fig. S1** Scheme of dual-active-sites with different arrangements of two single-active-sites on carbon nanotube.

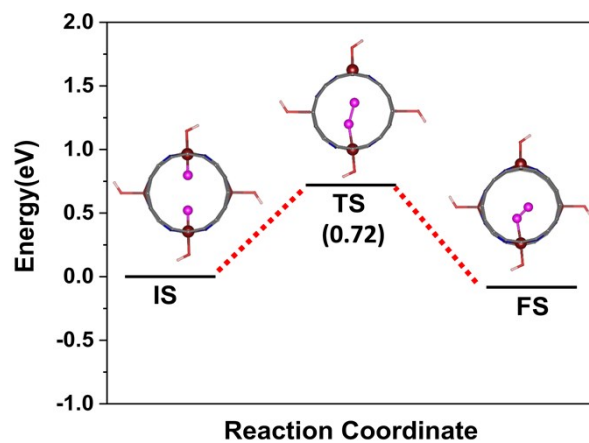

**Fig. S2** Potential energy profile of the oxygen molecule formation catalyzed by the dual-active-sites  $\text{FeN}_4(\text{OH})@\text{CNT}$ .

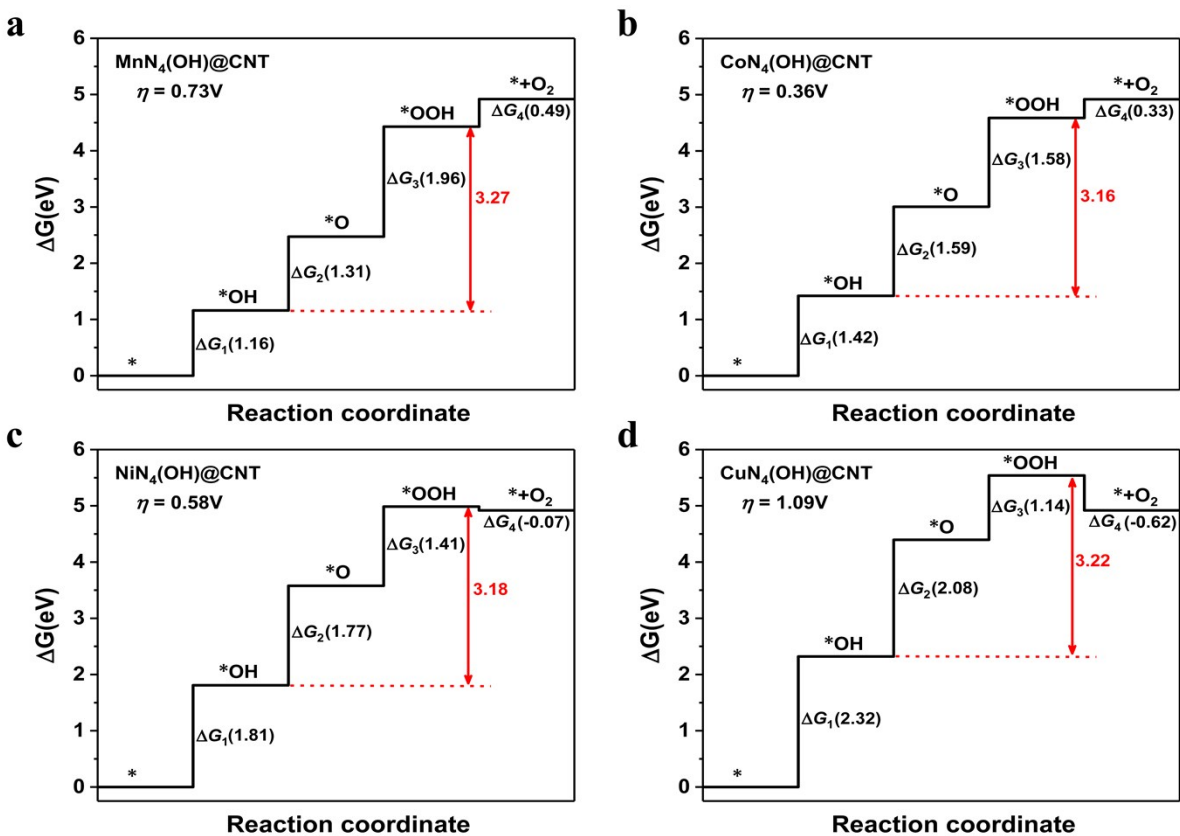

**Fig. S3** Gibbs free energy diagrams of the single-active-site OER catalysis on  $\text{MnN}_4(\text{OH})@\text{CNT}$  (a),  $\text{CoN}_4(\text{OH})@\text{CNT}$  (b),  $\text{NiN}_4(\text{OH})@\text{CNT}$  (c) and  $\text{CuN}_4(\text{OH})@\text{CNT}$  (d) structures.

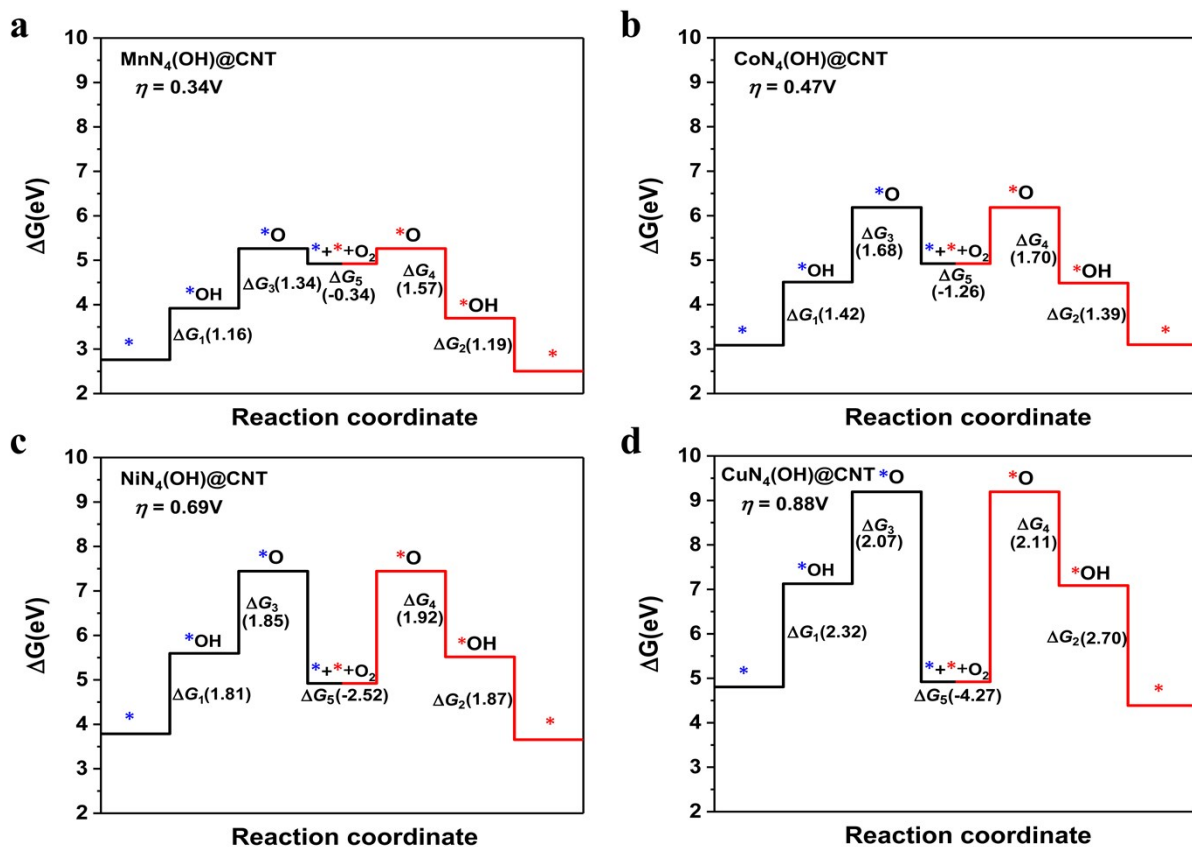

**Fig. S4** Gibbs free energy diagrams following the Eq.1-5 for the dual-active-sites OER catalysis on  $\text{MnN}_4(\text{OH})@\text{CNT}$  (a),  $\text{CoN}_4(\text{OH})@\text{CNT}$  (b),  $\text{NiN}_4(\text{OH})@\text{CNT}$  (c) and  $\text{CuN}_4(\text{OH})@\text{CNT}$  (d) structures.

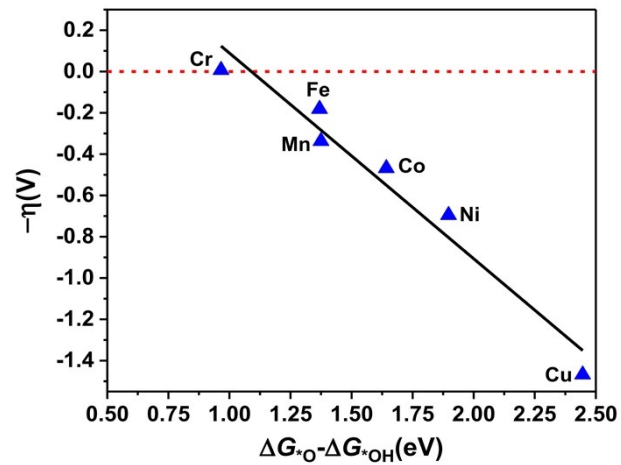

**Fig. S5** The linear scaling relationship between  $\Delta G^*_O - \Delta G^*_{OH}$  and theoretical overpotential for OER catalysis on the dual-active-sites  $TMN_4(OH)@CNT$ .

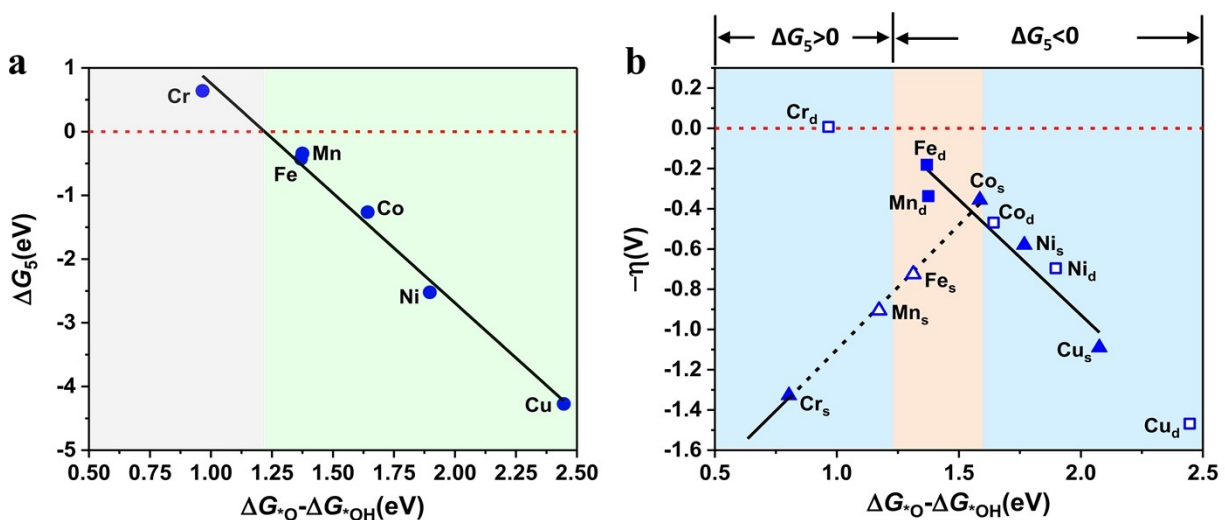

**Fig. S6** The linear scaling relations between  $\Delta G_5$  and  $\Delta G^*_O - \Delta G^*_{OH}$  for dual-active-sites catalysis of  $\text{TMN}_4(\text{OH})@\text{CNT}$ . The fitting correlational relationship is  $\Delta G_5 = -3.45(\Delta G^*_O - \Delta G^*_{OH}) + 4.21$ . (b) The volcano scaling relations of theoretical overpotentials function with  $\Delta G^*_O - \Delta G^*_{OH}$  for the  $\text{TMN}_4(\text{OH})@\text{CNT}$  single/dual-active-sites OER catalysis.  $\text{TM}_s = \text{TMN}_4(\text{OH})@\text{CNT}$  with single-active-site mechanism,  $\text{TM}_d = \text{TMN}_4(\text{OH})@\text{CNT}$  with dual-active-sites catalysis. The solid scatters mean the overpotentials with prior OER mechanism.

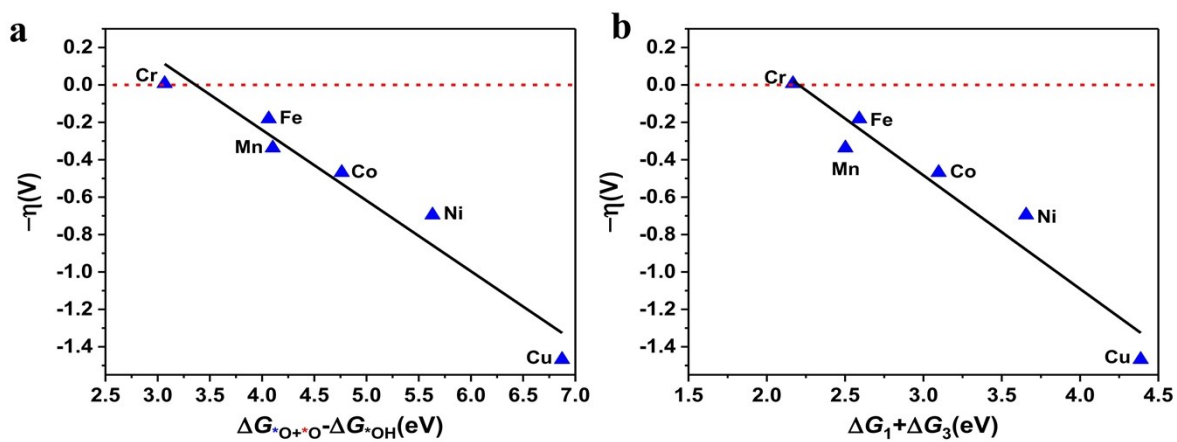

**Fig. S7** Linear scaling relation of theoretical overpotential function with  $\Delta G_{*O+*O} - \Delta G_{*OH}$  (a) and  $\Delta G_1 + \Delta G_3$  for the  $TMN_4(OH)@CNT$  dual-active-sites OER catalysis.

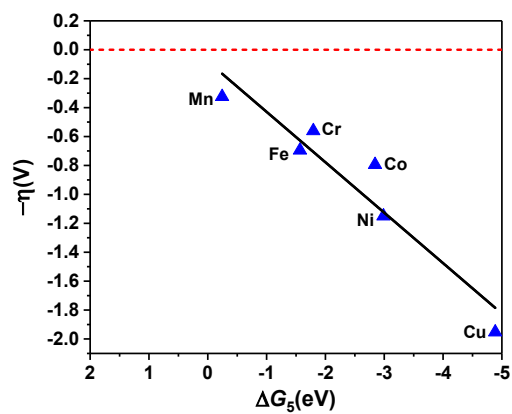

**Fig. S8** Linear scaling relation of theoretical overpotentials function with  $\Delta G_5$  for the  $\text{TMN}_4(\text{O})@\text{CNT}$  dual-active-sites OER catalysis.

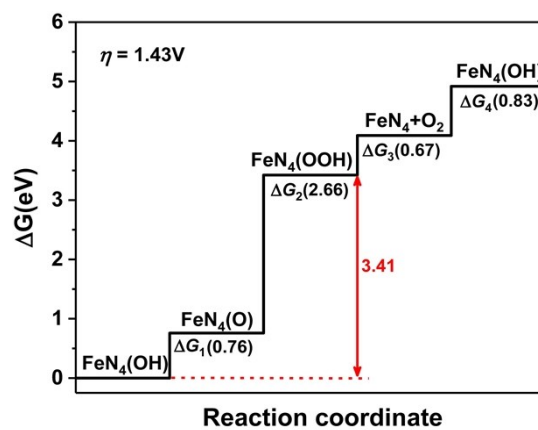

**Fig. S9** Gibbs free energy diagram of the single-active-site OER catalysis at the outside of FeN<sub>4</sub>(OH)@CNT with the coordinated OH involved.

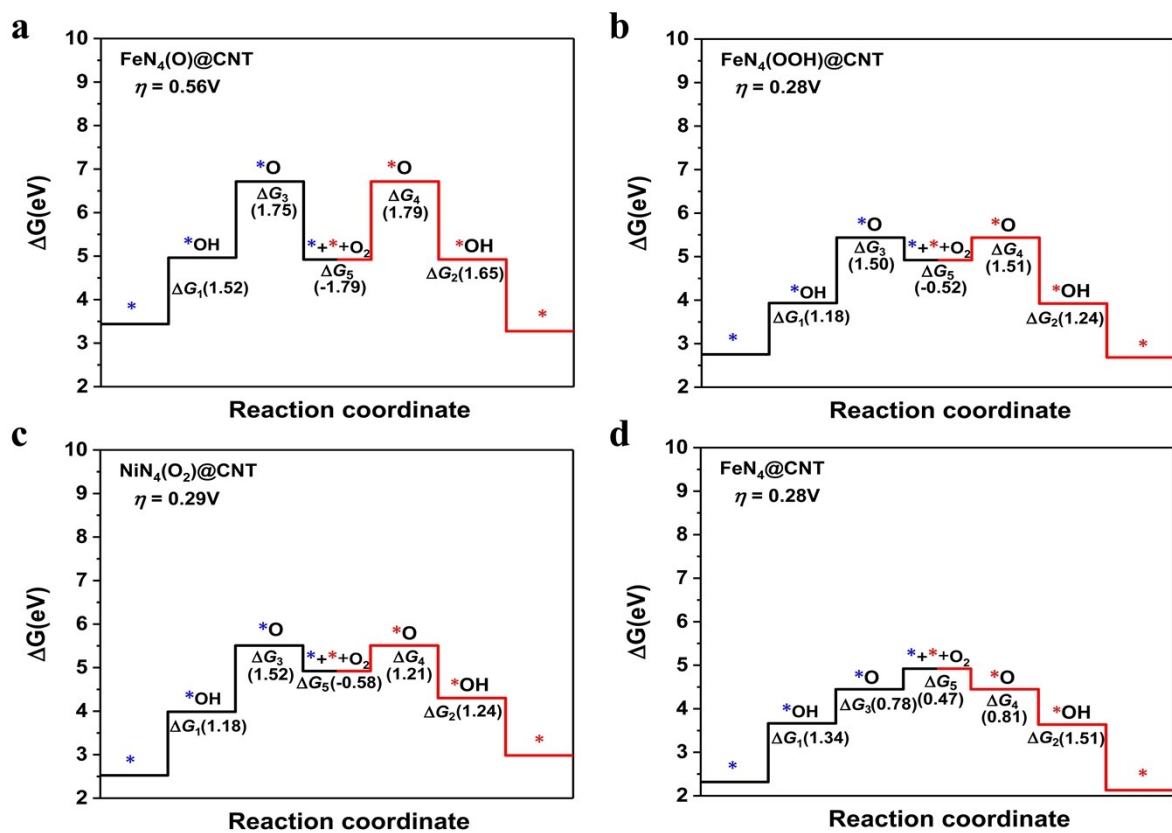

**Fig. S10** Gibbs free energy diagrams following the Eq. 1-5 for the dual-active-sites OER catalysis on  $\text{FeN}_4(\text{O})@\text{CNT}$  (a),  $\text{FeN}_4(\text{OOH})@\text{CNT}$  (b),  $\text{FeN}_4(\text{O}_2)@\text{CNT}$  (c) and  $\text{FeN}_4@\text{CNT}$  (d) structures.

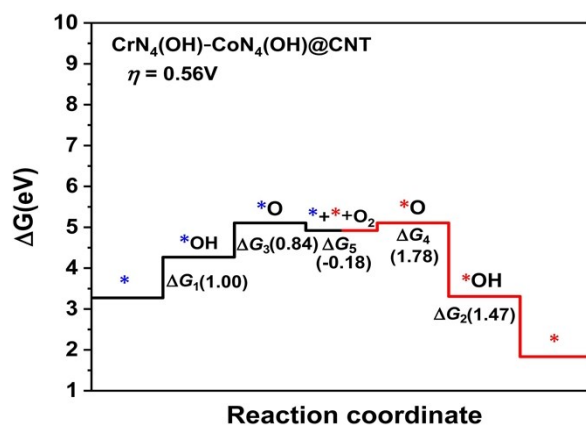

**Fig. S11** Gibbs free energy diagrams following the Eq.1-5 for the hetero-dual-active-sites OER catalysis on CrN<sub>4</sub>(OH)-CoN<sub>4</sub>(OH)@CNT. The blue and red asterisk stand for the CrN<sub>4</sub>(OH) and CoN<sub>4</sub>(OH) active sites, respectively.

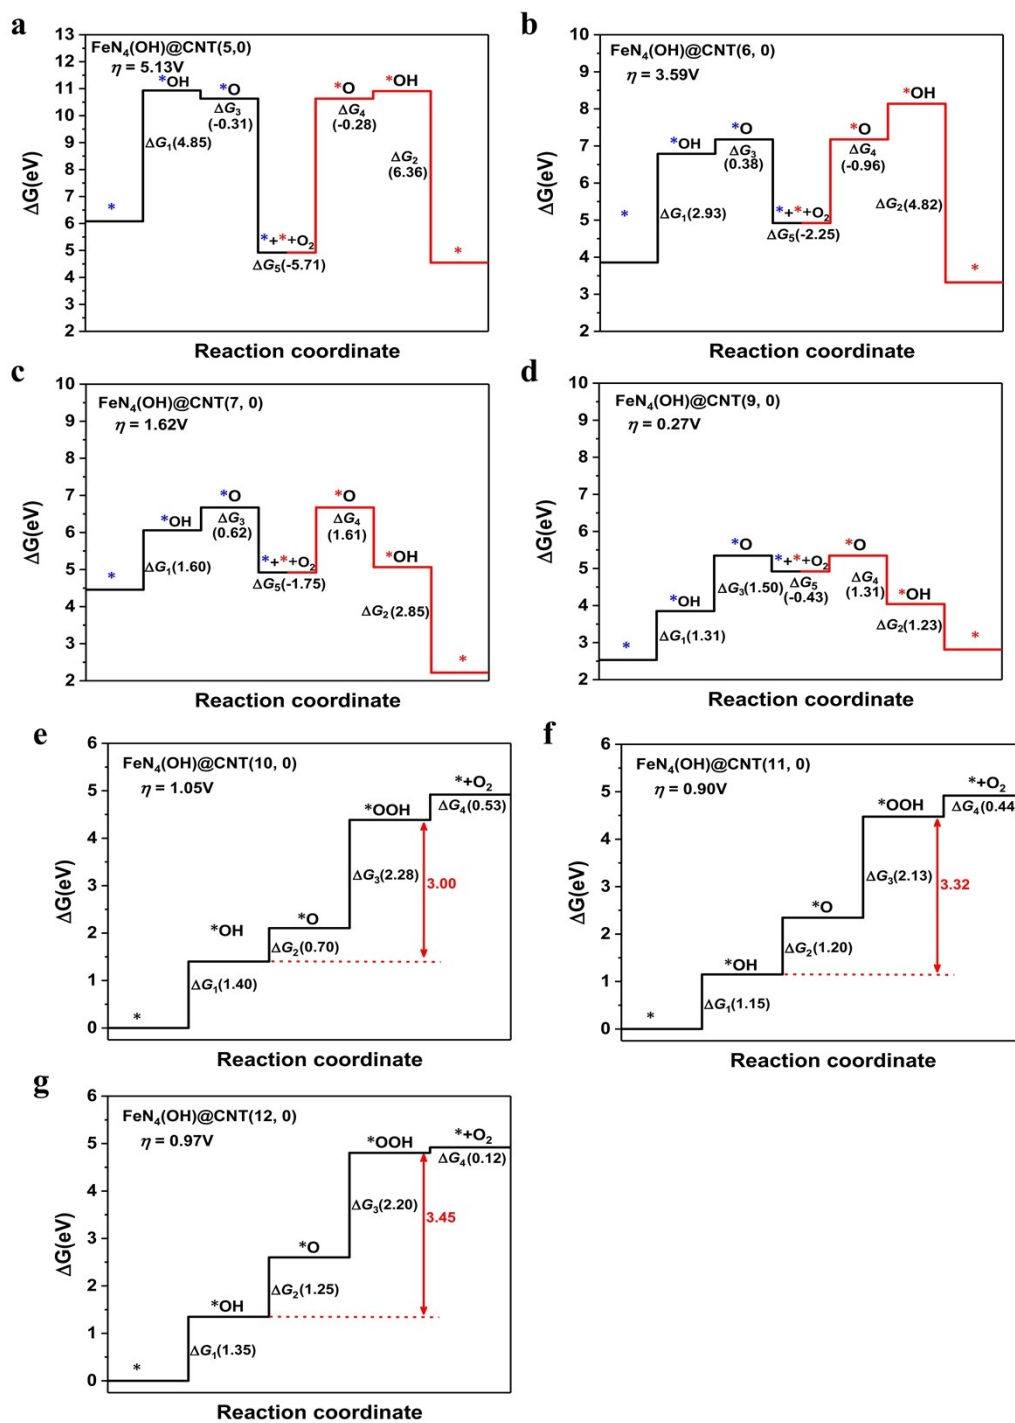

**Fig. S12** Gibbs free energy diagrams for the dual-active-sites and single-active-site OER catalysis on  $\text{FeN}_4(\text{OH})@\text{CNTs}$  ( $n, 0$ ) ( $n = 5, 6, 7, 8, 9, 10, 11, 12$ ) with different diameters.

The structure of CNT (4, 0) is not stable enough that even an oxygen atom adsorption could destroy its structure. As listed in Table S3, for the CNT (n, 0) (n=5, 6, 7), the weak binding energies of intermediates lead to poor OER activities in single-active-site and dual-active-sites catalysis. While as to CNT (9, 0), the  $d_{*O-*O}$  of 3.56 Å and  $\Delta G_{*O}$  of 2.53 eV enable the O<sub>2</sub> generation from Eq.5 with effective dual-active-sites catalytic activity ( $\eta = 0.27$  V). The distances between two adsorbed oxygen atoms in CNT (10, 0) and CNT (11, 0) are too far apart away from each other with  $d_{*O-*O}$  of 4.63 Å and 4.85 Å, respectively, which leads that Eq.5 cannot be realized in the cases of CNT (10, 0) and CNT (11, 0). Notably, the hydrogen bond interactions between the intermediates separately adsorbed on the two single-active-sites would be mainly determined by the distance between these two single-active-sites (inherited from the CNT diameter). For instance, the weak hydrogen bonds can generate by the two adsorbed \*OOHs with the distance of ~1.71 Å and 1.93 Å, causing large overpotentials of 1.05 V and 0.90 V for CNT (10, 0) and CNT (11, 0), respectively ( $d=7.83$  Å and  $8.61$  Å). When the calibre of nanotube is enlarged to CNT (12, 0) ( $d=9.39$  Å), it can be totally treated as the scene of two isolated single-active-sites with the overpotential of 0.97 V.

**Table S1** Calculated adsorption free energies for \*OH ( $\Delta G_{*OH}$ ) on the TMN<sub>4</sub>(OH) single-active-site using PBE and PBE+U. The U-J is the effective Hubbard-U parameter.

|                       | PBE  | U-J=1 | U-J=2 | U-J=3 | U-J=4 |
|-----------------------|------|-------|-------|-------|-------|
| $\Delta G_{*OH}$ (eV) | 1.28 | 1.80  | 2.15  | 2.46  | 2.77  |

**Table S2** The theoretical overpotentials ( $\eta$ ) for OER catalysis on the single-active-site and dual-active-sites TMN<sub>4</sub>(OH)@CNT.

|                       | $\eta$ (V)                      |                                |
|-----------------------|---------------------------------|--------------------------------|
|                       | Single-active-site<br>Mechanism | Dual-active-sites<br>Mechanism |
| CrN <sub>4</sub> (OH) | 1.13                            | -0.01                          |
| MnN <sub>4</sub> (OH) | 0.73                            | 0.34                           |
| FeN <sub>4</sub> (OH) | 0.91                            | 0.18                           |
| CoN <sub>4</sub> (OH) | 0.36                            | 0.47                           |
| NiN <sub>4</sub> (OH) | 0.58                            | 0.69                           |
| CuN <sub>4</sub> (OH) | 1.09                            | 1.46                           |

**Table S3** The spin states of metal atoms for the structures involved in the OER pathway on the single-active-site  $\text{TMN}_4(\text{OH})@\text{CNT}$  calculated by the DFT method.

|    | *    | *OH  | *O   | *OOH |
|----|------|------|------|------|
| Cr | 2.64 | 2.28 | 0.77 | 2.40 |
| Mn | 3.28 | 2.36 | 1.32 | 2.27 |
| Fe | 2.34 | 1.01 | 1.28 | 0.92 |
| Co | 2.61 | 0.17 | 0.55 | 0.10 |
| Ni | 1.54 | 0.68 | 0.92 | 0.70 |
| Cu | 0.47 | 0.09 | 0.13 | 0.12 |

**Table S4** The spin states of metal atoms for the structures involved in the OER pathway on the dual-active-sites TMN<sub>4</sub>(OH)@CNT calculated by the DFT method.

|    | *_*       | *OH-*     | *OH-*OH   | *O-*OH    | *O-*O     |
|----|-----------|-----------|-----------|-----------|-----------|
| Cr | 2.64/2.64 | 2.28/2.60 | 2.22/2.22 | 1.15/2.00 | 0.80/0.80 |
| Mn | 3.28/3.28 | 2.36/3.28 | 2.38/2.38 | 1.92/2.28 | 1.00/1.00 |
| Fe | 2.34/2.34 | 1.01/2.34 | 1.03/1.03 | 1.26/1.10 | 1.16/1.16 |
| Co | 2.61/2.61 | 0.17/2.58 | 0.22/0.22 | 0.54/0.25 | 0.61/0.61 |
| Ni | 1.54/1.54 | 0.68/1.54 | 0.69/0.69 | 0.51/0.69 | 0.93/0.93 |
| Cu | 0.47/0.47 | 0.09/0.48 | 0.09/0.09 | 0.04/0.18 | 0.12/0.12 |

**Table S5** The spin states of metal atoms for the structures involved in the OER pathway on the single-active-site  $\text{TMN}_4(\text{OH})@\text{CNT}$  calculated by the DFT+U method. U value of each transition metal atom was adopted according to the previous literature.<sup>6</sup>

|    | *    | *OH   | *O    | *OOH |
|----|------|-------|-------|------|
| Cr | 2.95 | 2.84  | 2.11  | 2.88 |
| Mn | 4.45 | 3.75  | 2.71  | 2.98 |
| Fe | 3.83 | 3.02  | 1.48  | 0.95 |
| Co | 2.65 | 0.01  | 0.38  | 0.01 |
| Ni | 1.63 | 0.92  | 0.96  | 0.95 |
| Cu | 0.59 | 0.004 | 0.016 | 0.04 |

**Table S6** The spin states of metal atoms for the structures involved in the OER pathway on the dual-active-sites TMN<sub>4</sub>(OH)@CNT calculated by the DFT+U method. U value of each transition metal atom was adopted according to the previous literature.<sup>6</sup>

|    | *_*       | *OH-*          | *OH-*OH         | *O-*OH         | *O-*O           |
|----|-----------|----------------|-----------------|----------------|-----------------|
| Cr | 2.95/2.95 | 2.84/2.94      | 2.80/2.80       | 2.22/2.64      | 2.03/2.03       |
| Mn | 4.45/4.45 | 3.75/4.45      | 3.72/3.72       | 2.71/2.79      | 2.70/2.70       |
| Fe | 3.83/3.83 | 3.02/3.88      | 2.95/2.95       | 1.50/2.93      | 1.44/1.44       |
| Co | 2.65/2.65 | 0.01/2.65      | 1.85/1.85       | 2.09/0.01      | 2.06/2.06       |
| Ni | 1.63/1.63 | 0.92/1.63      | 0.91/0.91       | 0.96/0.92      | 0.97/0.96       |
| Cu | 0.59/0.59 | 0.004/<br>0.59 | 0.006/<br>0.007 | 0.015/<br>0.03 | 0.001/<br>0.003 |

**Table S7** The distance between two FeN<sub>4</sub>(OH) active sites ( $d_{\text{Fe-Fe}}$ ), two adsorbed \*Os ( $d_{\text{*O-*O}}$ ) in different carbon nanotubes together with the corresponding  $\Delta G_5$  and overpotentials ( $\eta$ ).

|             | $d_{\text{Fe-Fe}}$<br>(Å) | $d_{\text{*O-*O}}$<br>(Å) | $\Delta G_5$<br>(eV) | $\eta$ (V)                      |                                |
|-------------|---------------------------|---------------------------|----------------------|---------------------------------|--------------------------------|
|             |                           |                           |                      | Single-active-site<br>Mechanism | Dual-active-sites<br>Mechanism |
| CNT (5, 0)  | 5.45                      | 1.41                      | -5.71                | ≥3.62                           | 5.13                           |
| CNT (6, 0)  | 6.25                      | 1.34                      | -2.26                | ≥1.70                           | 3.59                           |
| CNT (7, 0)  | 6.47                      | 2.32                      | -1.75                | ≥0.37                           | 1.62                           |
| CNT (8, 0)  | 7.14                      | 2.83                      | -0.43                | 0.91                            | 0.18                           |
| CNT (9, 0)  | 7.73                      | 3.56                      | -0.43                | 1.00                            | 0.27                           |
| CNT (10, 0) | 8.51                      | 4.63                      | --                   | 1.05                            | --                             |
| CNT (11, 0) | 9.01                      | 4.85                      | --                   | 0.90                            | --                             |
| CNT (12, 0) | 10.14                     | 5.89                      | --                   | 0.97                            | --                             |

## References

- (1) G. Kresse, J. Furthmuller. *J. Comput. Mater. Sci.* 1996, **6**, 15-50.
- (2) J. P. Perdew, K. Burke, M. Ernzerhof. *Phys. Rev. Lett.* 1997, **78**, 1396-1396.
- (3) P. E. Blöchl. *Phy. Rev. B* 1994, **50**, 17953-17979.
- (4) S. Grimme. *J. Comput.Chem.* 2006, **27**, 1787-1799.
- (5) G. Henkelman, B. P. Uberuaga, H. Jónsson. *J. Chem. Phy.* 2000, **113**, 9901-9904.
- (6) H. Xu, D. Chen, D. Cao, X. Zeng, *Nat. Catal.*, 2018, **1**, 339-348.
